# Supplementary material
Source: Springer Nature journal article supplement (https://www.springermedizin.de/resource/supplementary/13046_2011_456_MOESM5_ESM.pdf/9662272)

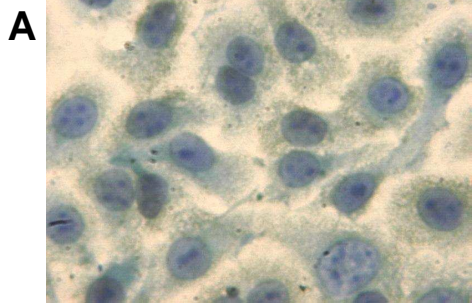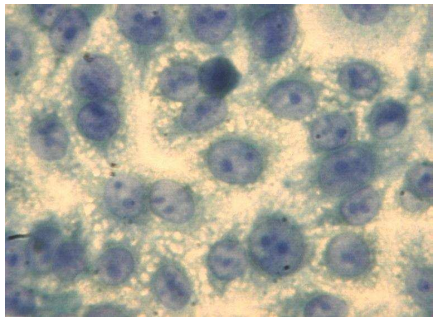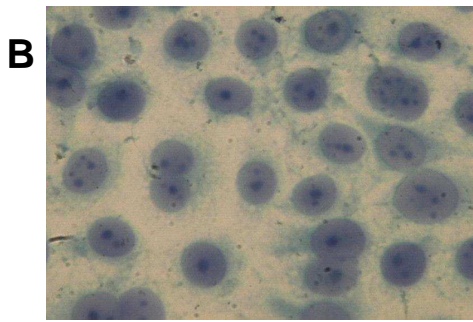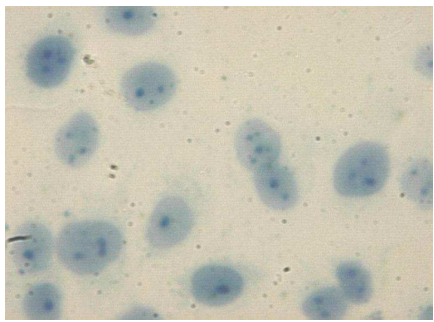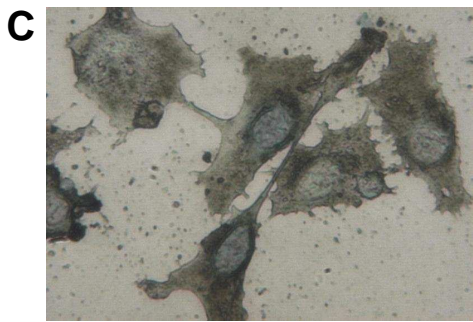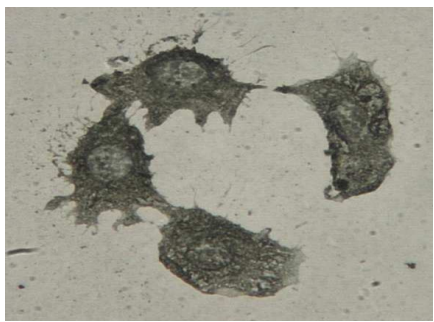

**CALO**

**INBL**

Supplement: MOESM5 [file 9662272]
